# Supplementary material
Source: publisher figshare collection journal article supplement (https://tandf.figshare.com/ndownloader/files/11307644)
Supplement: Supplementary file 1 [file 11307644]

Online Supplemental Material

News Parody Stimuli

**Study 1**

*Explicit Media Commentary Condition*

***The Colbert Report*** (5:41 minutes; airdate March 24, 2014). Focused on the speculative media coverage surrounding the Malaysian airliner that went missing mid-flight in the spring of 2014. Colbert mocked his “colleagues in the 24-hour news game” for entertaining a variety of far-fetched theories to explain the plane’s disappearance.

***Last Week Tonight with John Oliver***(5:52 minutes; airdate April 27, 2014). Pointedly critiqued the news media for “completely ignoring...the biggest election in human history”: the 2014 general election in India.

***The Daily Show with Jon Stewart***(5:33 minutes; airdate October 14, 2014). Centered on the news media’s hyped coverage of the Ebola virus in 2014.

*Implicit Media Commentary Condition*

***The Colbert Report*** (5:54 minutes; airdate September 16, 2014). Featured in the discussed the Obama administration’s strategy for combatting ISIS

***Last Week Tonight* *with John Oliver*** (5:55 minutes; airdate July 27, 2014). Offered explanations and critiques of America’s handling of its aging nuclear weapons stockpile, featuring snippets of news footage from CBS and CNN.

***The Daily Show with Jon Stewart***(5:56 minutes; airdate November 20, 2014). Examined the debate surrounding the Keystone XL Oil Pipeline legislation then under consideration in Congress.

**Study 2**

*Explicit Media Commentary Condition*

***Full Frontal with Samantha Bee*** (4:57 minutes; airdate June 6, 2016). Episode segment critiqued the news media’s obsession with the Donald Trump during the Republican primaries, effectively providing the Trump campaign with millions of dollars in free advertising.

***Last Week Tonight* *with John Oliver*** (5:20 minutes; airdate May 8, 2016). Criticized news media’s tendency to sloppily and sensationally report on and misrepresent new scientific findings.

*Implicit Media Commentary Condition*

***Full Frontal with Samantha Bee*** (5:35 minutes; airdate March 21, 2016). Show segment discussed legislation related to efforts to preserve thousands of rape kits across the country that sit in storage and have not yet been tested for DNA samples to potentially convict or acquit suspected rapists.

***Last Week Tonight* *with John Oliver*** (5:31 minutes; airdate February 14, 2016). Episode examines efforts in various states to pass legislation requiring photo identification to vote, as even legislators commonly cast votes for absent lawmakers in statehouses across the country.
